# Supplementary material
Source: PubMed Central journal article supplement (PMC5824031)
Supplement: JCM.01310-17_zjm999095861s1.pdf [file JCM.01310-17_zjm999095861s1.pdf]

Table S1: Discordant results with final interpretation

| Number | Age (years) | Gender | BD Veritor Result | Alere i Result | Culture Result | RT-PCR Result | Final Interpretation |
|--------|-------------|--------|-------------------|----------------|----------------|---------------|----------------------|
| 1      | 9           | M      | Positive          | Positive       | Negative       | Positive      | Positive             |
| 2      | 10          | M      | Positive          | Positive       | Negative       | Positive      | Positive             |
| 3      | 5           | M      | Positive          | Positive       | Negative       | Positive      | Positive             |
| 4      | 7           | M      | Positive          | Positive       | Negative       | Positive      | Positive             |
| 5      | 7           | M      | Positive          | Positive       | Negative       | Positive      | Positive             |
| 6      | 8           | M      | Positive          | Positive       | Negative       | Positive      | Positive             |
| 7      | 2           | F      | Positive          | Negative       | Negative       | Negative      | Negative             |
| 8      | 11          | M      | Positive          | Negative       | Negative       | Negative      | Negative             |
| 9      | 1           | M      | Positive          | Negative       | Negative       | Negative      | Negative             |
| 10     | 3           | F      | Positive          | Negative       | Negative       | Negative      | Negative             |
| 11     | 13          | M      | Positive          | Negative       | Negative       | Negative      | Negative             |
| 12     | 7           | M      | Negative          | Positive       | Positive       | Positive      | Positive             |
| 13     | 20          | F      | Negative          | Positive       | Positive       | Positive      | Positive             |
| 14     | 69          | F      | Negative          | Positive       | Positive       | Positive      | Positive             |
| 15     | 11          | F      | Negative          | Positive       | Positive       | Positive      | Positive             |
| 16     | 12          | M      | Negative          | Positive       | Positive       | Positive      | Positive             |
| 17     | 2           | F      | Negative          | Positive       | Positive       | Positive      | Positive             |
| 18     | 7           | F      | Negative          | Positive       | Positive       | Positive      | Positive             |
| 19     | 2           | M      | Negative          | Positive       | Positive       | Positive      | Positive             |
| 20     | 10          | M      | Negative          | Positive       | Positive       | Positive      | Positive             |
| 21     | 12          | F      | Negative          | Positive       | Positive       | Positive      | Positive             |
| 22     | 4           | M      | Negative          | Positive       | Negative       | Positive      | Positive             |
| 23     | 8           | F      | Negative          | Positive       | Negative       | Positive      | Positive             |
| 24     | 15          | F      | Negative          | Positive       | Negative       | Negative      | Negative             |
| 25     | 6           | F      | Negative          | Positive       | Negative       | Positive      | Positive             |
| 26     | 5           | F      | Negative          | Positive       | Negative       | Positive      | Positive             |
| 27     | 6           | F      | Negative          | Positive       | Negative       | Positive      | Positive             |
| 28     | 1           | F      | Negative          | Positive       | Negative       | Positive      | Positive             |
| 29     | 14          | F      | Negative          | Positive       | Negative       | Positive      | Positive             |
| 30     | 3           | F      | Negative          | Positive       | Negative       | Positive      | Positive             |
